# Supplementary material for: N-acetylcysteine Provides Cytoprotection in Murine Oligodendrocytes through Heme Oxygenase-1 Activity
Source: PubMed Central journal article supplement (PMC7460204; doi:10.3390/biomedicines8080240), 2020-07-23
Supplement: biomedicines-08-00240-s001.pdf [file biomedicines-08-00240-s001.pdf]

# N-acetylcysteine Provides Cytoprotection in Murine Oligodendrocytes through Heme Oxygenase-1 Activity

Jie Zhou, Marcia R. Terluk, Lisa Basso, Usha R. Mishra, Paul J. Orchard, James Cloyd, Henning Schröder and Reena V. Kartha

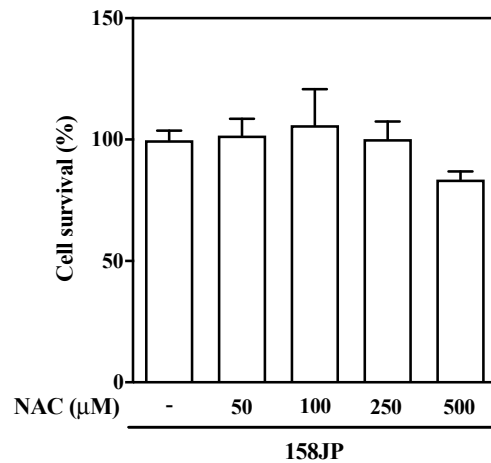

**Figure S1** Treatment with NAC does not improve 158JP cell survival. Cells were treated with increasing concentrations of NAC (50 to 500  $\mu$ M) for 24 h. Cell survival was calculated as the percentage of control cells, and results expressed as mean  $\pm$  SEM. Data were quantified using a colorimetric method and analyzed by one-way ANOVA with Tukey's post-hoc test.
